# Supplementary material for: Differential Reponses of Hematopoietic Stem and Progenitor Cells to mTOR Inhibition
Source: Hindawi journal article supplement (doi:10.1155/2015/561404), 2015-01-01

Fig. S1

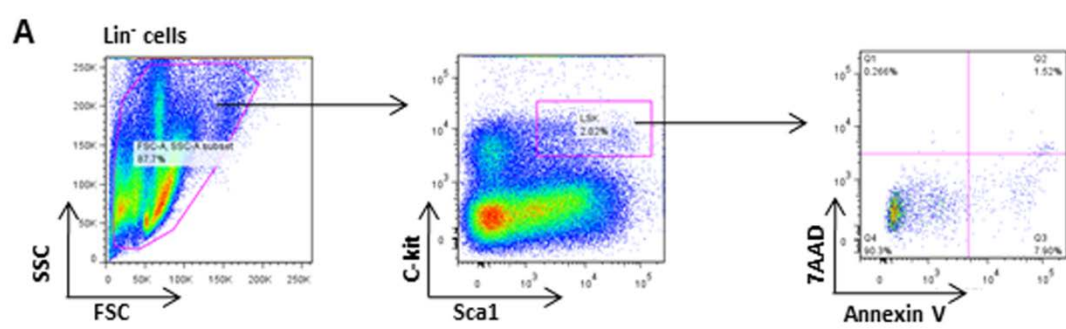

Fig. S2

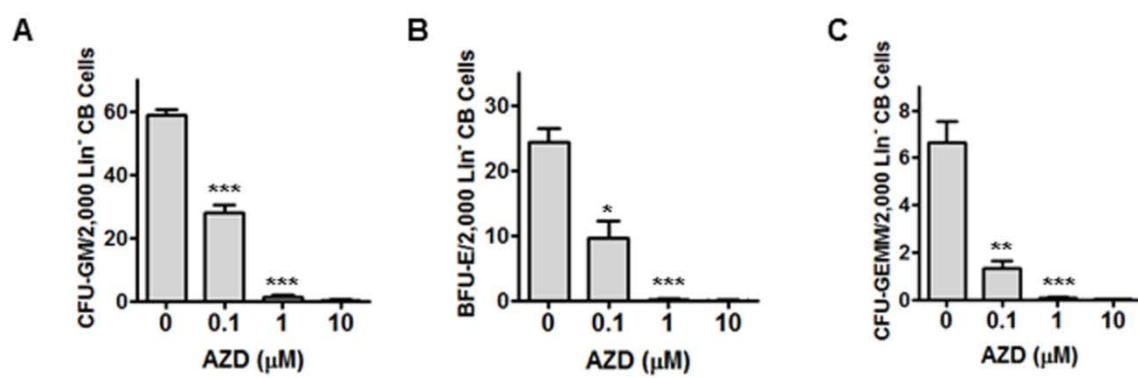

Supplement: f1 [file 561404.f1.pdf]
